# Supplementary material for: Wound Infections of Snakebites from the Venomous Protobothrops mucrosquamatus and Viridovipera stejnegeri in Taiwan: Bacteriology, Antibiotic Susceptibility, and Predicting the Need for Antibiotics—A BITE Study
Source: Toxins (Basel). 2020 Sep 7;12(9):575. doi: 10.3390/toxins12090575 (PMC7551380; doi:10.3390/toxins12090575)
Supplement: Supplementary file 1 [file toxins-12-00575-s001.xlsx]

## Sheet: Sheet1
					Penicillins			Cephalosporins				Fluoroquinolone			Aminoglycosides			Carbapenems			Macrolides		Others
Bacteria/Antibiotics	n	AM	AMC	SAM	OX	PIP	TZP	CZ	CXM	CRO	CAZ	CIP	LVX	MXF	GM	HGM	AN	ETP	IPM	MEM	CC	E	ATM	FA	MET	SXT	TE	TEC	TGC	VA
Aerobic Gram-positive bacteria
Enterococcus faecalis	3	5S	1R	3S		6S	4S	4R	2R3S	5S	5S	5S	4S		5S	5S	5S	1R4S					1S			4S	1S	5S		5S
Coagulase negative staphylococcus	1				1R	1R															1R	1R				1R		1S		1S
Staphylococcus aureus	2	1S		1R	5R1S	6R1S	1S	1R	1S	2S	1S	1S	2S	1S	1S		1S	1S			6R1S	6R1S		4S		1R7S			1S	7S
Staphylococcus saprophyticus	1				2R	2R															2R	2R		1S		2S		2S		2S
Viridans streptococcus	1	1S		1R	1S	1R1S	1S	1R	1S	2S	1S	1S	2S	1S	1S		1S	1S			1R1S	1R1S		1S		3S		2S		2S
Corynebacterium jeikeium	2			1R	3R	3R	1I	1R	1R	1R	1R	1S	1S		1R		1S	1I	1S	1S	3R	3R		1S		3R1S		3S		3S
Corynebacterium spp	1				1R	1R															1R	1R		1S		1S		1S	1S	1S
Aerobic Gram-negative bacteria
Morganella morganii	3	4S	1R	3S		5S	4S	4R	2R3S	5S	5S	5S	4S		5S	4S	5S	1R4S					1S			4S	1S	4S		4S
Aeromonas hydrophila	1	1S	1R			2S	1S	1R	1R1S	2S	2S	2S	1S		2S	1S	2S	1R1S					1S			1S	1S	1S		1S
Stenotrophomonas maltophilia	1	1S		1R	1S	1R1S	1S	1R	1S	2S	1S	1S	2S	1S	1S		1S	1S			1R1S	1R1S		1S		3S		2S		2S
Anaerobic bacteria
Bacteroides fragilis	1					2R															1S				1S
Peptostreptococcus micros	1			1S		1S1R															1S				1S
Enterobacter cloacae	1	1S		2R	1S	1R1S	2S	2R	1R1S	1R2S	1R1S	2S	3S	1S	2S		2S	2S			1R1S	1R1S		1S		4S		2S		2S
Enterobacter cloacae CR strain	1			2R	1R	1R	2I	2R	2R	2R	2R	2S	2S		2R		2S	2I	2S	2S	1R	1R				3R		1S		1S
AM=ampicillin; AMC=augmentin; AN=amikacin; ATM=aztreonam; CAZ=ceftazidime; CC=clindamycin; CIP=ciprofloxacin; CRO=ceftriaxone; CXM=cefuroxime; CZ=cefazolin; E=erythromycin; ETP=ertapenem; FA=fucidic acid; GM=gentamicin; HGM=high level gentamicin; IPM=imipenem; LVX=levofloxacin; MEM=meropenem; MET=metronidazole; MXF=moxifloxacin; OX=oxacillin; P=teicoplanin; PIP=piperacillin; SAM=ampicillin/sulbac…
